# Supplementary material for: Multiscale mixing patterns in networks
Source: PubMed Central journal article supplement — Proc Natl Acad Sci U S A. 2018 Apr 2;115(16):4057–62. doi: 10.1073/pnas.1713019115 (PMC5910813; doi:10.1073/pnas.1713019115), 2018-04-02
Supplement: pnas.201713019SI.pdf [file pnas.201713019SI.pdf]

# Supporting Information

Peel et al. 10.1073/pnas.1713019115

## SI Text

### A. Directed Networks

We can easily extend the multiscale mixing measure  $r_\alpha$  described in the main text to directed networks. The main change is to incorporate two sets of marginals  $a$  and  $b$  that describe the proportion of edges starting from and ending at each of the attribute types. Then the directed global assortativity of a network with respect to a particular categorical node attribute  $y_i$  is

$$r_{\text{global}} = \frac{\sum_g e_{gg} - \sum_g a_g b_g}{1 - \sum_g a_g b_g}, \quad [\text{S1}]$$

where  $a_g$  and  $b_g$  represent the total number of outgoing and incoming links of all nodes of type  $g$ ,

$$a_g = \sum_h e_{gh}, \quad b_h = \sum_g e_{gh}. \quad [\text{S2}]$$

Then we can update our definition of local assortativity accordingly,

$$r(\ell) = \frac{1}{Q_{\text{max}}} \sum_g (e_{gg}(\ell) - a_g b_g). \quad [\text{S3}]$$

### B. Scalar Attributes

For scalar attributes, we can simply calculate the Pearson's correlation across edges. Using  $x_i$  and  $x_j$  to indicate the scalar attribute value of the nodes in edge  $A_{ij}$ , then we can write the global assortativity as

$$r_{\text{global}} = \frac{\text{cov}(x_i, x_j)}{\sigma_i \sigma_j} \quad [\text{S4}]$$

$$= \frac{\sum_{ij} A_{ij} (x_i - \bar{x})(x_j - \bar{x})}{\sum_i k_i (x_i - \bar{x})^2}, \quad [\text{S5}]$$

where  $\bar{x} = 1/2m \sum_i k_i x_i$  is the mean value of  $x$  weighted by node degree  $k$  and  $\sigma_i$  is the SD of the attribute values. If we standardize the scalar values using the linear transformation  $\tilde{x}_i = \frac{x_i - \bar{x}}{\sigma_i}$ , then we can simplify this further as

$$r_{\text{global}} = \sum_{ij} \frac{A_{ij}}{2m} \tilde{x}_i \tilde{x}_j. \quad [\text{S6}]$$

Then we can calculate the local assortativity  $r_\alpha(\ell)$  for scalar variables as

$$r_\alpha(\ell) = \sum_{ij} w_\alpha(i; \ell) \frac{A_{ij}}{k_i} \tilde{x}_i \tilde{x}_j. \quad [\text{S7}]$$

Fig. S1 gives some examples of distributions of  $r_{\text{multi}}$  for scalar attributes in the food web network.

### C. Categorical Assortativity as a Correlation

The assortativity coefficient  $r_{\text{global}}$  for categorical attributes can be interpreted as a normalized Pearson's correlation. To see this, we start by observing that the Pearson's correlation of two binary variables is equivalent to the Phi coefficient for binary contingency tables (31). Table S1 shows a contingency table using the same notation as the directed assortativity, i.e.,  $a$  and  $b$  give the marginal proportions and  $e$  gives the joint proportions.

Then the Pearson product-moment correlation of these variables is known as  $\phi$ , which we derive using the moments of a Bernoulli distribution,

$$\phi = \frac{\mathbb{E}[y_i, y_j] - \mathbb{E}[y_i]\mathbb{E}[y_j]}{\sigma_{y_i} \sigma_{y_j}} \quad [\text{S8}]$$

$$= \frac{e_{11} - a_1 b_1}{\sqrt{a_1 a_0} \sqrt{b_1 b_0}}. \quad [\text{S9}]$$

Note that it is only necessary to calculate this in terms of  $e_{11}$ , since  $e_{11} - a_1 b_1 = e_{00} - a_0 b_0$ . We can see this using the identity  $e_{00} = b_0 - a_1 + e_{11}$ ,

$$e_{00} - a_0 b_0 = b_0 - a_1 + e_{11} - (1 - a_1)(1 - b_1) \quad [\text{S10}]$$

$$= (1 - b_1) - a_1 + e_{11} - (1 - a_1 - b_1 + a_1 b_1) \quad [\text{S11}]$$

$$= e_{11} - a_1 b_1. \quad [\text{S12}]$$

A well-known issue with  $\phi$  is that the extreme values of  $+1$  and  $-1$  are typically unobtainable, which can cause issues with its interpretation. In fact,  $\phi = 1$  can only occur if  $a_1 = b_1$ , e.g., when the network is undirected, while  $\phi = -1$  can only occur if  $a_1 = b_2 = 0.5$  (32, 33). To address this issue, there have been a number of proposed normalizations to ensure the  $\phi = 1$  is obtainable (34). One such normalization is the  $\phi/\phi_{\text{max}}$  proposed by Cureton (35),

$$\frac{\phi}{\phi_{\text{max}}} = \frac{e_{11} - a_1 b_1}{\beta - a_1 b_1}, \quad [\text{S13}]$$

where  $\beta$  is the maximum possible value that  $e_{11}$  can take, i.e.,  $\min(a_1 b_1)$ . Note that, for undirected networks,

$$\sqrt{a_1 b_1 a_2 b_2} = \sqrt{a_1^2 a_2^2} \quad [\text{S14}]$$

$$= a_1 a_2 \quad [\text{S15}]$$

$$= a_1 (1 - a_1) \quad [\text{S16}]$$

$$= a_1 - a_1^2, \quad [\text{S17}]$$

which equals  $\phi_{\text{max}}$  when  $a_1 \leq a_2$ .

Then we can generalize  $\phi/\phi_{\text{max}}$  from binary to multicategory variables by treating each distinct value as a binary variable and taking their sum. If we set  $\beta = 1$ , then we obtain Eq. S1, and thus we recover Newman's assortativity (13). We also note that Eq. S1 also corresponds to Cohen's  $\kappa$  that is frequently used to assess interrater agreement (36).

The normalization of the assortativity coefficient means that  $r_{\text{min}} \leq r \leq 1$  and

$$r_{\text{min}} = -\frac{\sum_g a_g b_g}{1 - \sum_g a_g b_g}, \quad [\text{S18}]$$

which lies in the range  $-1 \leq r_{\text{min}} < 0$ .

### D. Assortativity as Autocorrelation of a Time Series

Assume a scalar attribute  $x_i$  on each node  $i$  of an undirected network. As mentioned in the main text, the probability of being at node  $i$  is stationary and proportional to the degree,  $\pi_i = k_i/2m$ . Given that a random walker is currently at node  $i$ , it moves to node  $j$  with probability  $A_{ij}/k_i$ .

We define a random time series, using the simple random walker, as the sequence of attributes of the nodes visited in the random walk, i.e., the value of the time series at time  $t$  is the attribute value  $x$  of the node visited at time  $t$  in the random walk. Asymptotically, the average value observed by the random walker is  $\bar{x} = \sum_i \pi_i x_i = \sum k_i x_i / 2m$ , and the variance is  $\sigma^2 = \sum_i \pi_i x_i^2 - \bar{x}^2$ .

Likewise, the autocovariance between the attribute observed at two consecutive steps (time lag of 1) is  $R_x = \sum_{ij} \pi_i A_{ij} / k_i x_i x_j - \bar{x}^2$ . Replacing  $x$  by  $\tilde{x} = \frac{x - \bar{x}}{\sigma}$ , we obtain the autocorrelation  $R_{\tilde{x}} = \sum_{ij} \pi_i A_{ij} / k_i \tilde{x}_i \tilde{x}_j$ , which coincides with  $r_{\text{global}}$  as defined in Eq. S6.

When faced with categorical data, we proceed as in *SI Text*, section C. We consider, for each type  $g$  of nodes, the scalar attribute  $x_g$  valued at 1 for nodes with type  $g$  and zero elsewhere. The modularity  $Q$  is therefore the sum for each type  $g$  of the autocovariance,  $Q = \sum_g R_g$ . As in *SI Text*, section C, this can be normalized in various ways, one of which is Newman's global assortativity as used in this article, which therefore represents a sort of categorical autocorrelation of the time series process of the categorical attributes observed by the stationary simple random walker.

## E. Disconnected Networks

By using the personalized PageRank as a neighborhood function, it means that only nodes within the same connected component contribute to  $r_{\text{multi}}$ . Consequently,  $r_{\text{multi}}$  for each node is insensitive to whether multiple connected components are included.

## F. Missing Values

It is common, when dealing with real datasets, that some values may be missing. This is the case for the Facebook 100 data, where a number of node attributes are missing. When considering the global assortativity, previous work has simply ignored contributions from missing data values (3). That is, only edges that connect nodes for which both the attribute values are known are considered when calculating  $e_{gh}$ . This treatment works fine for the global assortativity, because each edge counts equally. However, simply omitting missing values when calculating the local assortativity can cause a bias in the distribution. For example, consider the case when node  $\ell$  and its immediate neighbors have missing values but, beyond those, the attribute values are known. For small values of  $\alpha$ , the weight  $w_\alpha(i; \ell)$  is largest for nodes with missing attribute values. Simply ignoring their edges would mean reassigning more weight to edges farther away from  $\ell$  when normalizing to ensure that  $\sum_{gh} e_{gh}(\ell) = 1$ , a necessary step in calculating the assortativity. Then, when we examine the distribution of  $r(\ell)$  across all nodes in the network, the resulting distribution will be a biased representation. To deal with this issue, we calculate each of the local assortativities as normal, but assign each a weight  $z_\ell = \sum_{gh} e_{gh}(\ell)$ , i.e., the sum of local edge counts before normalization. The weight  $z_\ell$  describes our confidence in the local assortativity estimate from  $z_\ell = 0$ , indicating no confidence, to  $z_\ell = 1$  when all node attributes within the neighborhood are known. We adjust for these weights when plotting the histograms in the main text.

## G. Calculating the Personalized PageRank Vector

The personalized PageRank vector is the stationary distribution of a random walk with restarts. We calculate it by direct simulation of the random walk process using the power method:

$$w_\alpha(i; \ell)_{s+1} = \alpha \sum_j \frac{A_{ij}}{k_i} w_\alpha(j; \ell)_s + (1 - \alpha) \delta_{i,\ell}, \quad [\text{S19}]$$

and, at convergence, yields a distribution  $w(i; \ell)$  with a mode at  $\ell$ .

## H. Integrating over $\alpha$

To integrate over all values of  $\alpha$ , we take advantage of the fact that we can equivalently write the  $\eta$ th approximation the power method in Eq. S19 as the  $\eta$ th degree truncation of the power series (37),

$$w_\alpha(i; \ell)_\eta = \delta_{i,\ell} + \sum_{s=1}^{\eta} \alpha^s \left[ \left( \frac{A_{i\ell}}{k_i} \right)^s - \left( \frac{A_{i\ell}}{k_i} \right)^{(s-1)} \right]. \quad [\text{S20}]$$

By taking advantage of the relationship between  $\alpha$  and the sequence of approximations computed by the power method, we can calculate the distribution  $w_\alpha(i; \ell)$  for a given  $\alpha = \alpha_0$  and use the sequence of approximations to calculate the distribution for any other  $\alpha$  (37),

$$w_\alpha(i; \ell)_\eta = \delta_{i,\ell} + \sum_{s=1}^{\eta} \frac{\alpha^s}{\alpha_0^s} (w(i; \ell, \alpha_0)_s - w(i; \ell, \alpha_0)_{s-1}). \quad [\text{S21}]$$

We can then integrate over all possible values of  $\alpha$  (23),

$$w_{\text{multi}}(i; \ell)_\eta = \int_0^1 w_\alpha(i; \ell)_\eta d\alpha \quad [\text{S22}]$$

$$= \delta_{i,\ell} + \sum_{s=1}^{\eta} \frac{(w_{\alpha_0}(i; \ell)_s - w_{\alpha_0}(i; \ell)_{s-1})}{(s+1)\alpha_0^s}. \quad [\text{S23}]$$

## I. Null Model Network Generation

We created a null model to generate networks with the same global assortativity as the observed network to compare the distributions of  $r_{\text{multi}}$ . For a fair comparison, we decided to keep the node degree and metadata label fixed while randomly rewiring the network. We do so using a modified version of the Markov chain Monte Carlo (MCMC) sampling of the configuration model for stub-labeled simple graphs (38) [for simple graphs, sampling from the space of stub-labeled graphs is equivalent to sampling from the space of vertex-labeled graphs (38)]. The modification is to ensure that we sample a graph with (approximately) the same global assortativity as the observed network. We achieve this by adding a rejection sampling step based on the binomial likelihood of observing the number of edges between nodes of the same type  $m_{\text{in}} = m \sum_g e_{gg}$  given the proportion of edges required to maintain the global assortativity  $\omega_{\text{in}} = \sum_g e_{gg}$ ,

$$L(G_i) = \log \binom{m}{m_{\text{in}}} (\omega_{\text{in}})^{m_{\text{in}}} (1 - \omega_{\text{in}})^{m - m_{\text{in}}}. \quad [\text{S24}]$$

The modified MCMC algorithm is shown in Algorithm 1.

### Algorithm 1: stub-labeled MCMC.

**Require:** initial simple graph  $G_0$ , initial temp.  $t_0$

**Ensure:** sequence of graphs  $G_i$

**for**  $i < \text{number of graphs to sample}$  **do**

choose two edges at random

randomly choose one of the two possible swaps

**if** edge swap would create a self-loop or multiedge **then**

resample current graph:  $G_i \leftarrow G_{i-1}$

**else**

**if**  $Unif(0, 1) < \exp(L(G_i) - L(G_{i-1})/t_i)$  **then**

swap the chosen edges, producing  $G_i$

**else**

reject  $G_i$

$t_{i+1} \leftarrow \text{update}(t_i)$ .

## J. Datasets

**Weddell Sea Food Web.** The food web of the Antarctic Weddell Sea (4) consists of 488 species and 15,885 consumer relations. For each of the nodes in this network, we have five categorical attributes: Metabolic Category {*Plant*, *Ectotherm vertebrate*, *Endotherm vertebrate*, *Invertebrate*}, Feeding Type {*Carnivorous/necrovorous*, *Herbivorous/detrivorous*, *Detrivorous*, *Omnivorous*, *Primary producer*, *Carnivorous*}, FeedingMode {*Pelagic predator*, *Predator/scavenger*, *Primary producer*, *Predator*, *Deposit-feeder*, *Grazer*, *Suspension-feeder*}, Mobility {1, 2, 3, 4}, Environment {*Bathydemersal*, *Land-based*, *Resource*, *Pelagic*,



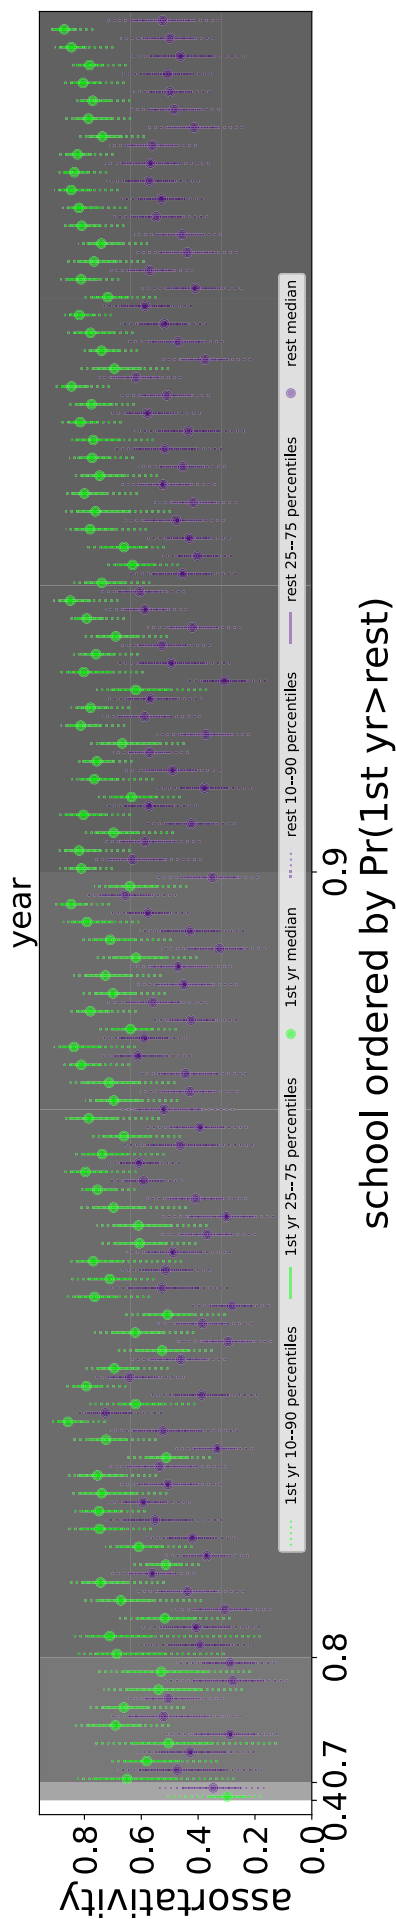

**Fig. S2.** Distributions of the local assortativity by year separated into first years and the rest of the students for each school. Schools are ordered by increasing proportion of first years that are more assortative than the rest of the students. First-year students are more assortative than the rest for all schools except for one.

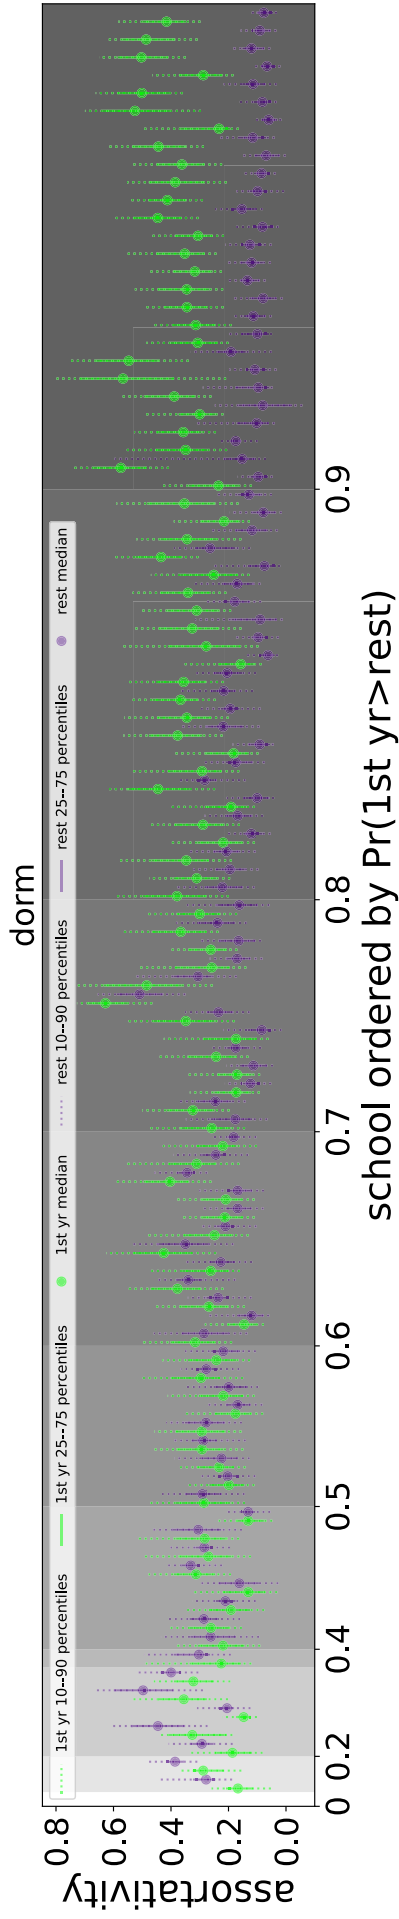

**Fig. S3.** Distributions of the local assortativity by residence (dorm) separated into first years and the rest of the students for each school. Schools are ordered by increasing proportion of first years that are more assortative than the rest of the students. In general, first-year students are more assortative than the rest; however, there are some schools in which the difference between first year and the rest is negligible. In a few schools, we observe that the first-year students are less assortative than the rest.

**Table S1. Binary contingency table**

|           |           |           |       |
|-----------|-----------|-----------|-------|
|           | $y_j = 0$ | $y_j = 1$ |       |
| $y_i = 0$ | $e_{00}$  | $e_{01}$  | $a_0$ |
| $y_i = 1$ | $e_{10}$  | $e_{11}$  | $a_1$ |
|           | $b_0$     | $b_1$     |       |

**Table S2. List of schools ordered by global assortativity**

| No. | School           | $r_{\text{global}}$ | No. | School          | $r_{\text{global}}$ |
|-----|------------------|---------------------|-----|-----------------|---------------------|
| 1   | Amherst 41       | 0.081               | 51  | William 77      | 0.203               |
| 2   | Princeton 12     | 0.087               | 52  | Emory 27        | 0.205               |
| 3   | Trinity 100      | 0.106               | 53  | UCLA 26         | 0.208               |
| 4   | Stanford 3       | 0.109               | 54  | Tennessee 95    | 0.209               |
| 5   | Swarthmore 42    | 0.109               | 55  | Wake 73         | 0.212               |
| 6   | Johns Hopkins 55 | 0.110               | 56  | MIT 8           | 0.219               |
| 7   | Hamilton 46      | 0.113               | 57  | UMass 92        | 0.222               |
| 8   | Bowdoin 47       | 0.118               | 58  | Berkeley 13     | 0.222               |
| 9   | Harvard 1        | 0.120               | 59  | USC 35          | 0.224               |
| 10  | Brown 11         | 0.120               | 60  | Temple 83       | 0.228               |
| 11  | Dartmouth 6      | 0.126               | 61  | UVA 16          | 0.230               |
| 12  | Wellesley 22     | 0.127               | 62  | Penn 94         | 0.231               |
| 13  | Haverford 76     | 0.128               | 63  | Northwestern 25 | 0.234               |
| 14  | Wesleyan 43      | 0.128               | 64  | Rutgers 89      | 0.235               |
| 15  | UConn 91         | 0.129               | 65  | UPenn 7         | 0.235               |
| 16  | Tufts 18         | 0.130               | 66  | Michigan 23     | 0.236               |
| 17  | Williams 40      | 0.133               | 67  | FSU 53          | 0.238               |
| 18  | Reed 98          | 0.134               | 68  | Cornell 5       | 0.238               |
| 19  | Columbia 2       | 0.136               | 69  | UC 64           | 0.251               |
| 20  | BC 17            | 0.136               | 70  | American 75     | 0.253               |
| 21  | Duke 14          | 0.144               | 71  | Notre Dame 57   | 0.255               |
| 22  | Virginia 63      | 0.149               | 72  | Rochester 38    | 0.256               |
| 23  | Oberlin 44       | 0.151               | 73  | Vassar 85       | 0.256               |
| 24  | Villanova 62     | 0.158               | 74  | Lehigh 96       | 0.258               |
| 25  | Howard 90        | 0.159               | 75  | Texas 80        | 0.261               |
| 26  | WashU 32         | 0.162               | 76  | USFCA 72        | 0.263               |
| 27  | Georgetown 15    | 0.162               | 77  | UC 61           | 0.265               |
| 28  | Colgate 88       | 0.164               | 78  | Syracuse 56     | 0.270               |
| 29  | UF 21            | 0.165               | 79  | Yale 4          | 0.273               |
| 30  | BU 10            | 0.167               | 80  | UCSB 37         | 0.277               |
| 31  | Carnegie 49      | 0.171               | 81  | Cal 65          | 0.279               |
| 32  | GWU 54           | 0.171               | 82  | Texas 84        | 0.291               |
| 33  | Bingham 82       | 0.176               | 83  | UChicago 30     | 0.291               |
| 34  | NYU 9            | 0.182               | 84  | Smith 60        | 0.292               |
| 35  | UNC 28           | 0.185               | 85  | Mississippi 66  | 0.297               |
| 36  | Simmons 81       | 0.186               | 86  | Baylor 93       | 0.297               |
| 37  | USF 51           | 0.187               | 87  | Ullinios 20     | 0.297               |
| 38  | JMU 79           | 0.187               | 88  | MU 78           | 0.306               |
| 39  | UCF 52           | 0.187               | 89  | Tulane 29       | 0.313               |
| 40  | Santa 74         | 0.188               | 90  | Mich 67         | 0.322               |
| 41  | Northeastern 19  | 0.190               | 91  | UGA 50          | 0.336               |
| 42  | Maine 59         | 0.190               | 92  | Wisconsin 87    | 0.338               |
| 43  | Middlebury 45    | 0.190               | 93  | UCSD 34         | 0.355               |
| 44  | Brandeis 99      | 0.193               | 94  | Indiana 69      | 0.356               |
| 45  | Bucknell 39      | 0.194               | 95  | UC 33           | 0.361               |
| 46  | MSU 24           | 0.195               | 96  | Auburn 71       | 0.370               |
| 47  | Pepperdine 86    | 0.198               | 97  | Oklahoma 97     | 0.397               |
| 48  | Vermont 70       | 0.199               | 98  | Caltech 36      | 0.426               |
| 49  | Maryland 58      | 0.199               | 99  | UCSC 68         | 0.480               |
| 50  | Vanderbilt 48    | 0.201               | 100 | Rice 31         | 0.504               |

The number given after each university name is the School Index and indicates the order in which they joined Facebook.
